# Supplementary material for: Identification of Nanoparticle Properties for Optimal Drug Delivery across a Physiological Cell Barrier
Source: MDPI journal article supplement (doi:10.3390/pharmaceutics15010200), 2023-01-06
Supplement: s1 [file s1]

# Identification of Nanoparticle Properties for Optimal Drug Delivery Across a Physiological Cell Barrier

Aisling M. Ross<sup>1,2,\*</sup>, Rachel M. Cahalane<sup>1,2,3</sup>, Darragh R. Walsh<sup>1,2</sup>, Andreas M. Grabrucker<sup>1,4,5</sup>, Lynnette Marcar<sup>6</sup> and John J. E. Mulvihill<sup>1,2,4,\*</sup>

## File S4 – Cell Viability

The viability of the various cells were evaluated and statistically analysed against different NP parameters (size, zeta potential).

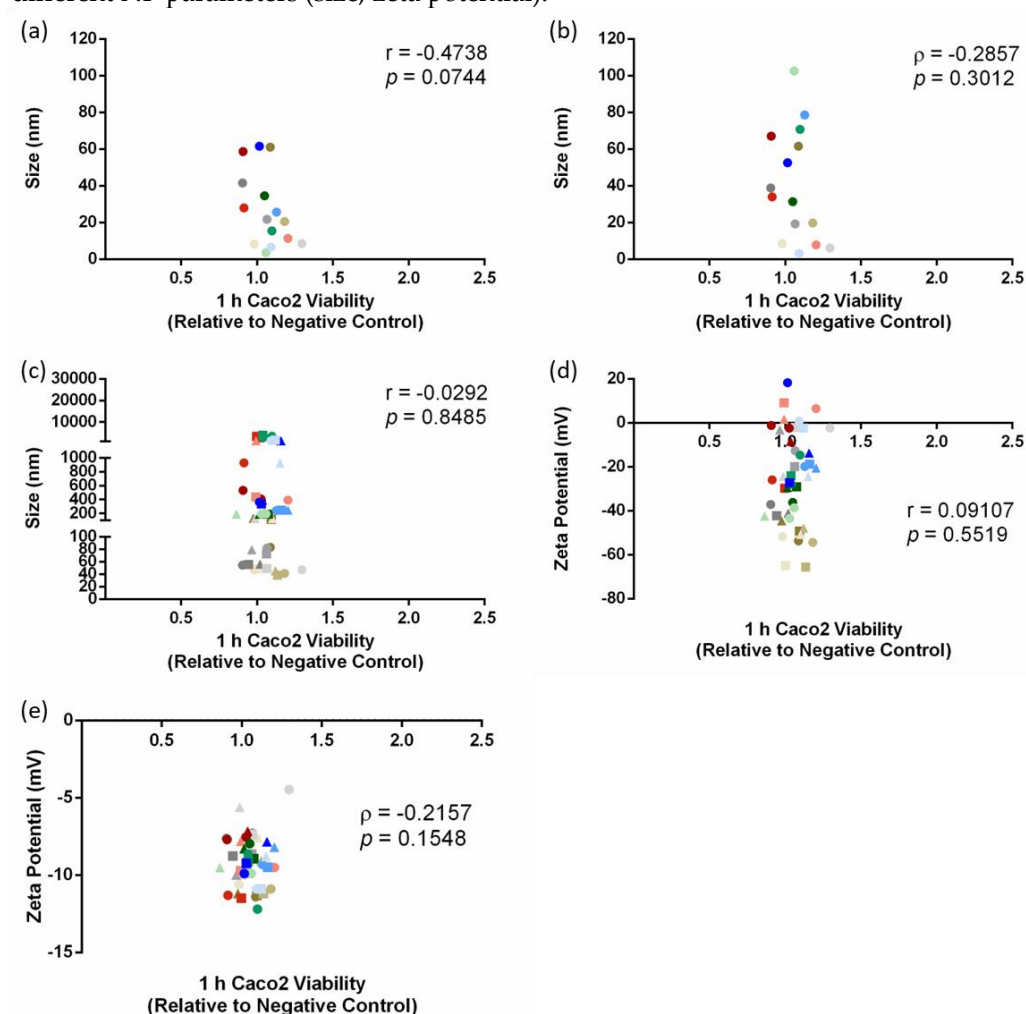

**Figure S4.** Correlations between changes to Caco-2 cell viability after 1 h nanoparticle (NP) treatment and NP properties. (a) Pearson's correlation between Caco-2 cell viability after 1 h treatment and NP size (measured via TEM) in water. (b) Spearman's correlation between Caco-2 cell viability after 1 h treatment and NP size (measured via TEM) in media. (c) Pearson's correlation between Caco-2 cell viability after 1 h treatment and nanoparticle size (measured via DLS) in water. (d) Pearson's correlation between Caco-2 cell viability after 1 h treatment and nanoparticle zeta potential measured in water. (e) Spearman's correlation between Caco-2 cell viability after 1 h treatment and nanoparticle zeta potential measured in media. ● = 100 µg/mL NP dispersion, ■ = 10 µg/mL NP dispersion, Δ = 1 µg/mL NP dispersion, TEM = Transmission electron microscopy, DLS = Dynamic Light Scattering.

light scattering. Colour Key for all graphs: Au = Gold, Ag = Grey, Fe<sub>2</sub>O<sub>3</sub> = Red, TiO<sub>2</sub> = Green, and ZnO = Blue.

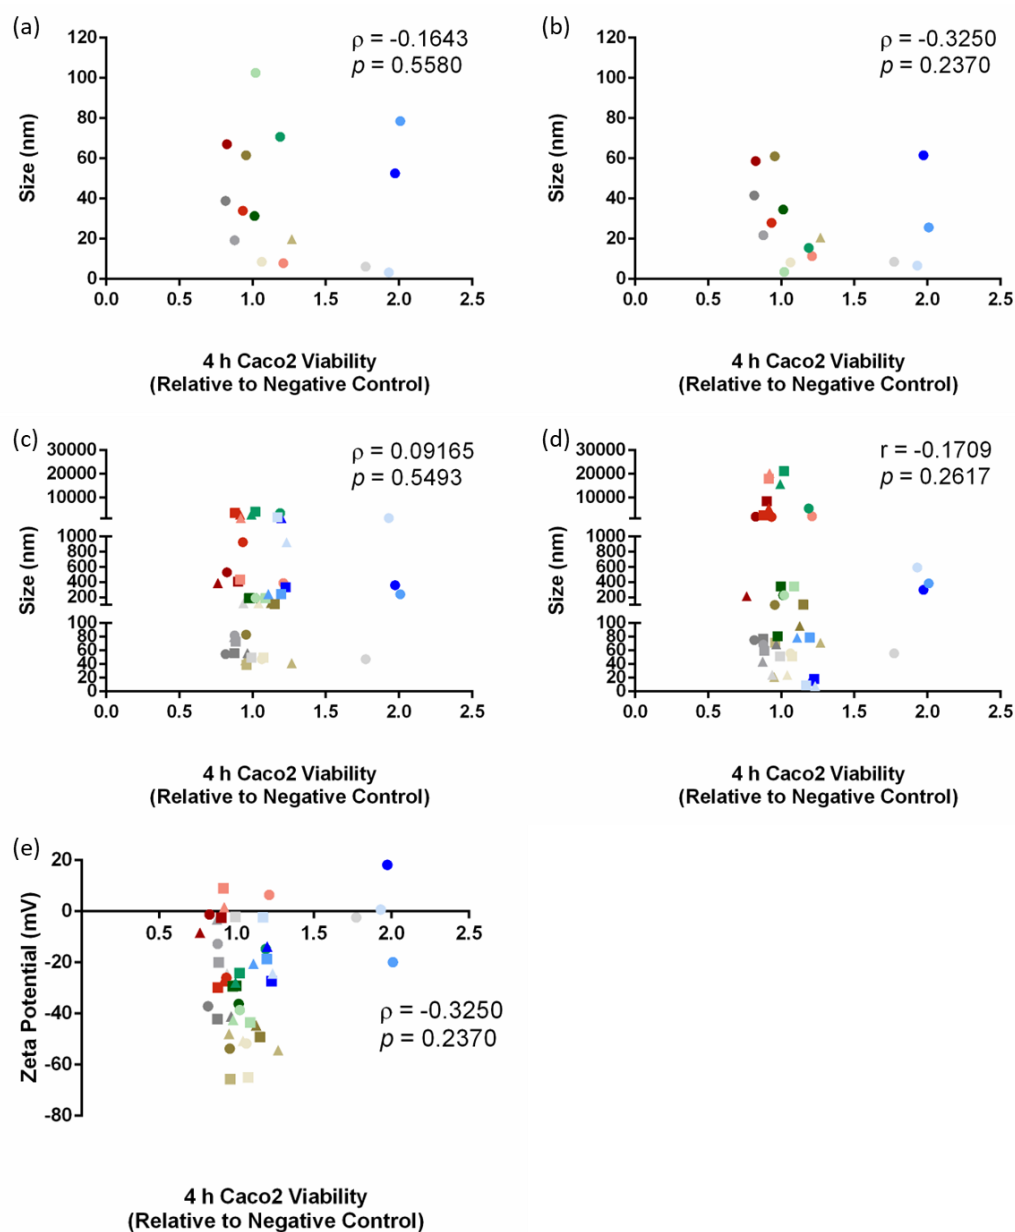

**Figure S5.** Correlations between changes to Caco-2 cell viability after 4 h nanoparticle (NP) treatment and NP properties. (a) Spearman's correlation between Caco-2 cell viability after 4 h treatment and NP size (measured via TEM) in water. (b) Spearman's correlation between Caco-2 cell viability after 4 h treatment and NP size (measured via TEM) in media. (c) Spearman's correlation between Caco-2 cell viability after 4 h treatment and NP size (measured via DLS) in water. (d) Pearson's correlation between Caco-2 cell viability after 4 h treatment and NP size (measured via DLS) in media. (e) Spearman's correlation between Caco-2 cell viability after 4 h treatment and NP zeta potential in water. ● = 100 µg/mL NP dispersion, ■ = 10 µg/mL NP dispersion, Δ = 1 µg/mL NP dispersion, TEM = Transmission electron microscopy, DLS = Dynamic light scattering. Colour Key for all graphs: Au = Gold, Ag = Grey, Fe<sub>2</sub>O<sub>3</sub> = Red, TiO<sub>2</sub> = Green, and ZnO = Blue.

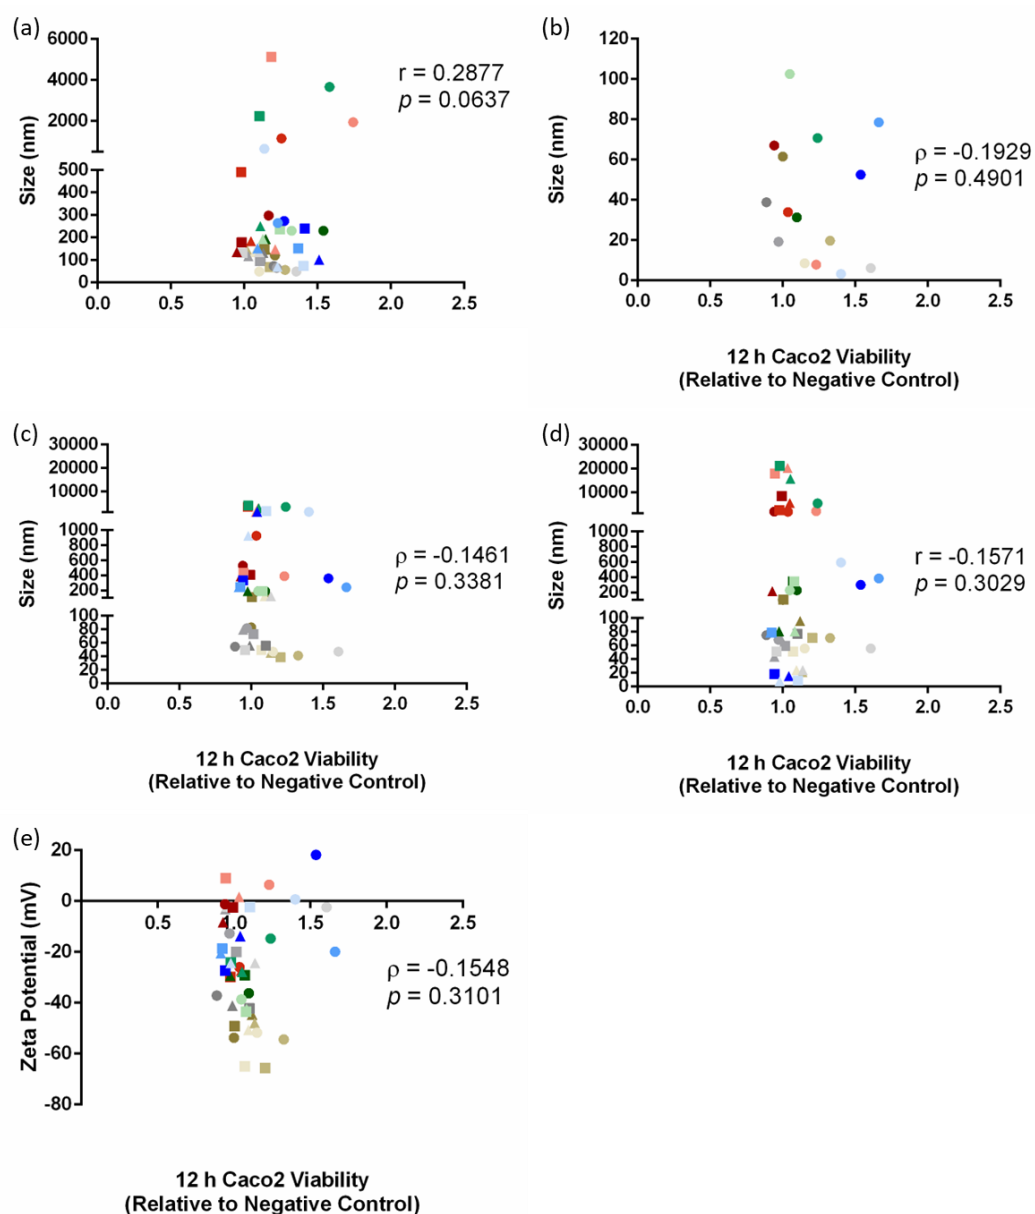

**Figure S6.** Correlations between changes to Caco-2 cell viability after 12 h nanoparticle (NP) treatment and NP properties. (a) Pearson's correlation between Caco-2 cell viability after 12 h treatment and NP size (measured via TEM) in water. (b) Spearman's correlation between Caco-2 cell viability after 12 h treatment and NP size (measured via TEM) in media. (c) Spearman's correlation between Caco-2 cell viability after 12 h treatment and NP size (measured via DLS) in water. (d) Pearson's correlation between Caco-2 cell viability after 12 h treatment and NP size (measured via DLS) in media. (e) Spearman's correlation between Caco-2 cell viability after 12 h treatment and NP zeta potential in water. ● = 100 µg/mL dose NP dispersion, ■ = 10 µg/mL NP dispersion, Δ = 1 µg/mL NP dispersion, TEM = Transmission electron microscopy, DLS = Dynamic light scattering. Colour Key for all graphs: Au = Gold, Ag = Grey, Fe<sub>2</sub>O<sub>3</sub> = Red, TiO<sub>2</sub> = Green, and ZnO = Blue.

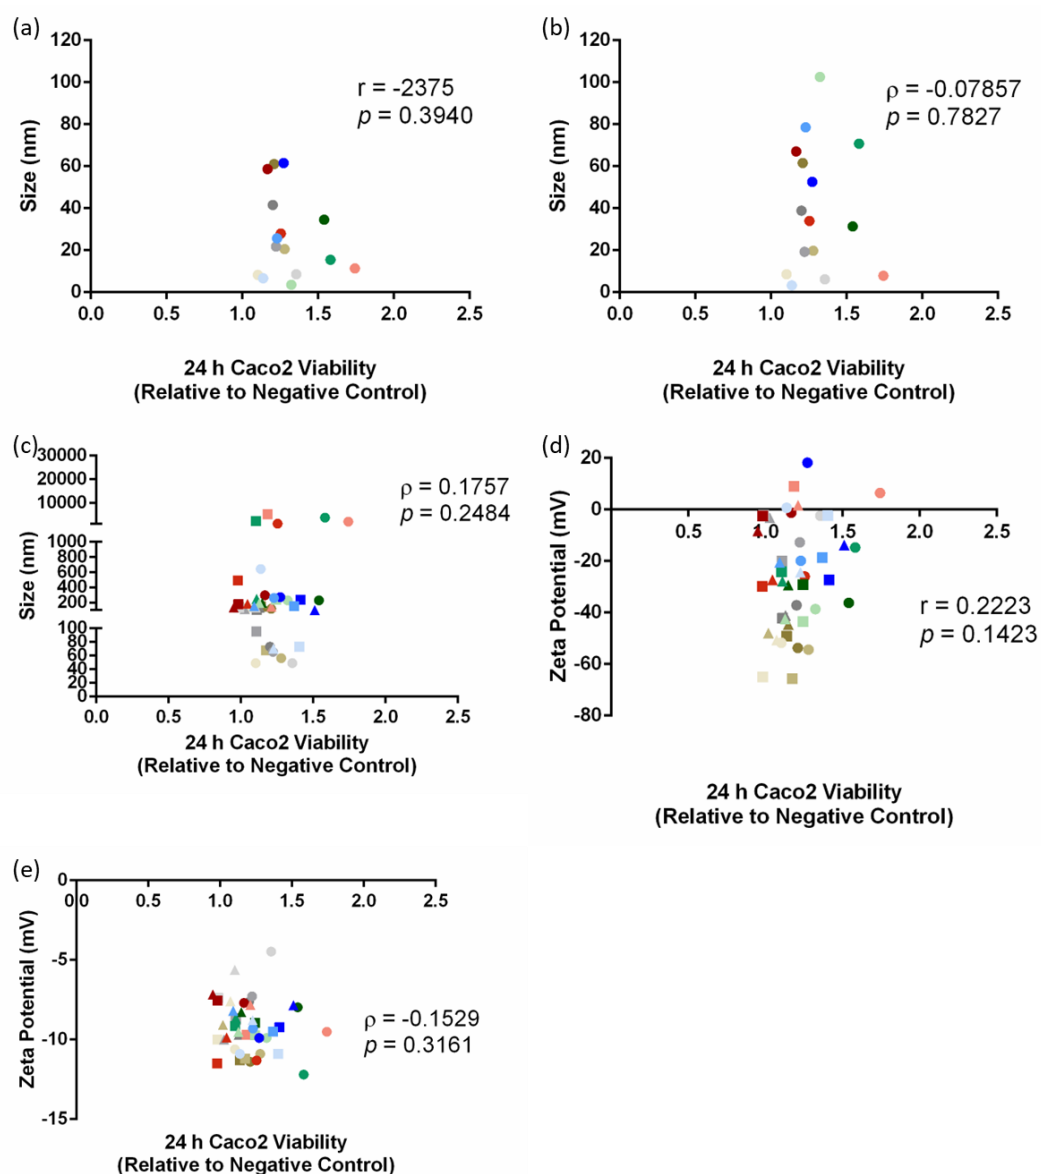

**Figure S7.** Correlations between changes to Caco-2 cell viability after 24 h nanoparticle (NP) treatment and NP properties. (a) Pearson's correlation between Caco-2 cell viability after 24 h treatment and NP size (measured via TEM) in water. (b) Spearman's correlation between Caco-2 cell viability after 24 h treatment and NP size (measured via TEM) in media. (c) Spearman's correlation between Caco-2 cell viability after 24 h treatment and NP size (measured via DLS) in water. (d) Pearson's correlation between Caco-2 cell viability after 24 h treatment and NP zeta potential measured in water. (e) Spearman's correlation between Caco-2 cell viability after 24 h treatment and NP zeta potential measured in media. ● = 100 µg/mL NP dispersion, ■ = 10 µg/mL NP dispersion, △ = 1 µg/mL NP dispersion, TEM = Transmission electron microscopy, DLS = Dynamic light scattering. Colour Key for all graphs: Au = Gold, Ag = Grey, Fe<sub>2</sub>O<sub>3</sub> = Red, TiO<sub>2</sub> = Green, and ZnO = Blue.
