# Supplementary material for: Identification of Nanoparticle Properties for Optimal Drug Delivery across a Physiological Cell Barrier
Source: Pharmaceutics. 2023 Jan 6;15(1):200. doi: 10.3390/pharmaceutics15010200 (PMC9865979; doi:10.3390/pharmaceutics15010200)
Supplement: Supplementary file 1 [file pharmaceutics-15-00200-s001.zip]

Archive with 4 entries (4 files):
- File S1 - Nanoparticle Synthesis.pdf
- File S2 - Nanoparticle Characterisation.pdf
- File S3 ¿C Nanoparticle Permeation and Resistance.pdf
- File S4 ¿C Cell Viability.pdf
